# Supplementary material for: The Mutation-Associated Neoantigen Functional Expansion of Specific T Cells (MANAFEST) Assay: A Sensitive Platform for Monitoring Antitumor Immunity
Source: Oxford University Press journal article supplement (doi:10.1158/2326-6066.cir-18-0129), 2018-06-12
Supplement: 23266066cir180129-sup-197967_2_supp_4765730_p8w2bb.xlsx [file 23266066cir180129-sup-197967_2_supp_4765730_p8w2bb.xlsx]

## Sheet: peptide_summary
	positive_clones	sum_freq
BMLF1_A2	2	1.72235
EBV1_A11	1	0.0537667
EBV_BZLF1_B8	2	0.218185
EBV_EBNA_4NP_A11	5	48.2349
Flu_A_A2	1	0.0897308
Flu_M_A11	2	0.103443
Flu_M_A2	4	0.898172
Flu_NP_B8	5	0.419008
LMP2A_A2	2	0.0864771
pp65_A2	3	0.0936219

## Sheet: positive_clones_summary
	condition	baseline_percent	FC:baseline	No_Pep_percent	FC:No_Pep
CASSLSASGDQPQHF	EBV_BZLF1_B8	0.00445489	35	0.00191263	82
CASSLIHGGTEAFF	EBV_BZLF1_B8	0.00445489	14	0	64
CSARDRVGNTIYF	BMLF1_A2	0.0133647	113	0.00573789	262
CSAITDRANDQPQHF	BMLF1_A2	0.0100235	22	0.00191263	113
CASSLGETQYF	Flu_NP_B8	0.00445489	79	0.00860684	41
CASTNTWVSTDTQYF	Flu_NP_B8	0.00445489	5	0	24
CASALHMNTEAFF	Flu_NP_B8	0.00779606	3	0.000956316	21
CASSLAPGVTEAFF	Flu_NP_B8	0.00556861	3	0	16
CASSYRGLNTEAFF	Flu_NP_B8	0.00445489	2	0	11
CASSHGGRVYEQYF	EBV1_A11	0.00668233	8	0.00956316	6
CASSLAAGYAYGYTF	pp65_A2	0.00890978	7	0.00860684	7
CASSLRDTNYGYTF	pp65_A2	0.00668233	3	0	19
CASSLGEKLFF	pp65_A2	0.00556861	3	0.00191263	8
CSVDRGNDNEQFF	LMP2A_A2	0.0167058	4	0.00765052	8
CASSPRMGAPDTQYF	LMP2A_A2	0.00445489	6	0.00478158	6
CASGGNIQYF	Flu_A_A2	0.0100235	9	0.0105195	9
CASSLTSAAGELFF	EBV_EBNA_4NP_A11	0.14367	148	0.0497284	427
CASSLTSATGELFF	EBV_EBNA_4NP_A11	0.129192	134	0.0841558	206
CASSPTSATGELFF	EBV_EBNA_4NP_A11	0.0211607	375	0.0267768	296
CASSLKGTRDQETQYF	EBV_EBNA_4NP_A11	0.00556861	293	0	1706
CASSLSYEQYF	EBV_EBNA_4NP_A11	0.00668233	23	0.00478158	32
CAISERQGSYGYTF	Flu_M_A11	0.00890978	10	0.00191263	45
CASSSGRGSTEQYF	Flu_M_A11	0.00445489	4	0.00191263	9
CASSIRSSYEQYF	Flu_M_A2	0.00445489	112	0.00286895	174
CASSQDRAQSTGELFF	Flu_M_A2	0.0100235	18	0.0219953	8
CAWSVMWGRGYTF	Flu_M_A2	0.0133647	15	0.0392089	5
CAWINGGGNTIYF	Flu_M_A2	0.0167058	1	0.00286895	6

## Sheet: all_sample_data
	condition	EBV_BZLF1_B8_abundance	BMLF1_A2_abundance	EBV_EBNA_3A_B8_abundance	Flu_NP_B8_abundance	baseline_abundance	EBV1_A11_abundance	pp65_A2_abundance	LMP2A_A2_abundance	Flu_A_A2_abundance	No_Pep_abundance	EBV_EBNA_4NP_A11_abundance	EBV2_A11_abundance	Flu_M_A11_abundance	Flu_M_A2_abundance	EBV_EBNA_3_B8_percent	Pool_percent	EBV_BZLF1_B8_percent	BMLF1_A2_percent	EBV_EBNA_3A_B8_percent	Flu_NP_B8_percent	baseline_percent	EBV1_A11_percent	pp65_A2_percent	LMP2A_A2_percent	Flu_A_A2_percent	No_Pep_percent	EBV_EBNA_4NP_A11_percent	EBV2_A11_percent	Flu_M_A11_percent	Flu_M_A2_percent
CASSLSASGDQPQHF	EBV_BZLF1_B8	33	0	4	5	4	1	2	2	2	2	0	0	2	6	0.00121913	0.135197	0.156524	0	0.0153651	0.00479414	0.00445489	0.00298704	0.0018179	0.00540482	0.00181274	0.00191263	0	0	0.00188078	0.00779889
CASSLIHGGTEAFF	EBV_BZLF1_B8	13	0	4	1	4	0	7	1	0	0	0	1	0	1	0.00121913	0.191932	0.0616611	0	0.0153651	0.000958828	0.00445489	0	0.00636265	0.00270241	0	0	0	0.00642178	0	0.00129982
CSARDRVGNTIYF	BMLF1_A2	1	451	4	0	12	1	4	1	4	6	1	0	7	3	0.0134104	0.808768	0.00474316	1.50539	0.0153651	0	0.0133647	0.00298704	0.0036358	0.00270241	0.00362549	0.00573789	0.00452018	0	0.00658272	0.00389945
CSAITDRANDQPQHF	BMLF1_A2	0	65	3	7	9	2	1	1	3	2	0	1	3	2	0	0.00120712	0	0.216963	0.0115238	0.0067118	0.0100235	0.00597407	0.00090895	0.00270241	0.00271912	0.00191263	0	0.00642178	0.00282117	0.00259963
CASSLGETQYF	Flu_NP_B8	2	3	4	365	4	5	14	5	9	9	1	0	21	4	0.0121913	0.00241423	0.00948632	0.0100137	0.0153651	0.349972	0.00445489	0.0149352	0.0127253	0.0135121	0.00815735	0.00860684	0.00452018	0	0.0197482	0.00519926
CASTNTWVSTDTQYF	Flu_NP_B8	0	0	0	24	4	1	4	0	1	0	0	0	0	3	0.00365738	0	0	0	0	0.0230119	0.00445489	0.00298704	0.0036358	0	0.000906372	0	0	0	0	0.00389945
CASALHMNTEAFF	Flu_NP_B8	0	1	1	21	7	0	6	0	0	1	0	0	3	5	0.0048765	0	0	0.0033379	0.00384128	0.0201354	0.00779606	0	0.0054537	0	0	0.000956316	0	0	0.00282117	0.00649908
CASSLAPGVTEAFF	Flu_NP_B8	0	0	0	16	5	0	0	0	0	0	0	0	1	0	0	0	0	0	0	0.0153412	0.00556861	0	0	0	0	0	0	0	0.000940389	0
CASSYRGLNTEAFF	Flu_NP_B8	0	0	0	11	4	0	1	0	0	0	0	0	0	0	0	0	0	0	0	0.0105471	0.00445489	0	0.00090895	0	0	0	0	0	0	0
CASSHGGRVYEQYF	EBV1_A11	0	0	0	0	6	18	0	1	2	10	1	0	1	1	0	0	0	0	0	0	0.00668233	0.0537667	0	0.00270241	0.00181274	0.00956316	0.00452018	0	0.000940389	0.00129982
CASSLAAGYAYGYTF	pp65_A2	1	0	0	3	8	2	67	1	0	9	0	0	20	1	0.00121913	0	0.00474316	0	0	0.00287648	0.00890978	0.00597407	0.0608997	0.00270241	0	0.00860684	0	0	0.0188078	0.00129982
CASSLRDTNYGYTF	pp65_A2	0	0	0	0	6	0	20	0	0	0	0	0	5	0	0	0	0	0	0	0	0.00668233	0	0.018179	0	0	0	0	0	0.00470194	0
CASSLGEKLFF	pp65_A2	0	0	0	2	5	0	16	0	0	2	0	0	1	1	0	0	0	0	0	0.00191766	0.00556861	0	0.0145432	0	0	0.00191263	0	0	0.000940389	0.00129982
CSVDRGNDNEQFF	LMP2A_A2	1	1	1	3	15	2	7	22	4	8	2	0	4	4	0.00609563	0.00120712	0.00474316	0.0033379	0.00384128	0.00287648	0.0167058	0.00597407	0.00636265	0.059453	0.00362549	0.00765052	0.00904037	0	0.00376156	0.00519926
CASSPRMGAPDTQYF	LMP2A_A2	0	1	0	9	4	1	2	10	2	5	1	0	7	3	0.00121913	0	0	0.0033379	0	0.00862945	0.00445489	0.00298704	0.0018179	0.0270241	0.00181274	0.00478158	0.00452018	0	0.00658272	0.00389945
CASGGNIQYF	Flu_A_A2	1	0	4	11	9	1	6	2	99	11	0	0	5	6	0.0109721	0	0.00474316	0	0.0153651	0.0105471	0.0100235	0.00298704	0.0054537	0.00540482	0.0897308	0.0105195	0	0	0.00470194	0.00779889
CASSLTSAAGELFF	EBV_EBNA_4NP_A11	9	15	15	62	129	72	48	9	70	52	4693	6	34	42	0.0548607	17.4489	0.0426884	0.0500684	0.0576192	0.0594473	0.14367	0.215067	0.0436296	0.0243217	0.063446	0.0497284	21.2132	0.0385307	0.0319732	0.0545922
CASSLTSATGELFF	EBV_EBNA_4NP_A11	9	19	18	46	116	95	48	24	61	88	3829	16	40	49	0.0438885	15.8567	0.0426884	0.06342	0.069143	0.0441061	0.129192	0.283768	0.0436296	0.0648579	0.0552887	0.0841558	17.3078	0.102749	0.0376156	0.063691
CASSPTSATGELFF	EBV_EBNA_4NP_A11	1	4	5	50	19	7	16	9	25	28	1754	1	10	10	0.019506	8.88318	0.00474316	0.0133516	0.0192064	0.0479414	0.0211607	0.0209093	0.0145432	0.0243217	0.0226593	0.0267768	7.9284	0.00642178	0.00940389	0.0129982
CASSLKGTRDQETQYF	EBV_EBNA_4NP_A11	1	2	1	5	5	1	3	0	9	0	361	1	1	1	0	1.31817	0.00474316	0.00667579	0.00384128	0.00479414	0.00556861	0.00298704	0.00272685	0	0.00815735	0	1.63179	0.00642178	0.000940389	0.00129982
CASSLSYEQYF	EBV_EBNA_4NP_A11	1	1	1	1	6	1	2	6	3	5	34	0	0	2	0.0109721	0.00241423	0.00474316	0.0033379	0.00384128	0.000958828	0.00668233	0.00298704	0.0018179	0.0162145	0.00271912	0.00478158	0.153686	0	0	0.00259963
CAISERQGSYGYTF	Flu_M_A11	0	1	1	11	8	0	5	0	5	2	0	1	91	1	0.0048765	0.00120712	0	0.0033379	0.00384128	0.0105471	0.00890978	0	0.00454475	0	0.00453186	0.00191263	0	0.00642178	0.0855754	0.00129982
CASSSGRGSTEQYF	Flu_M_A11	0	0	0	1	4	0	0	0	4	2	0	0	19	4	0.00121913	0	0	0	0	0.000958828	0.00445489	0	0	0	0.00362549	0.00191263	0	0	0.0178674	0.00519926
CASSIRSSYEQYF	Flu_M_A2	0	0	0	3	4	0	3	0	5	3	0	1	2	384	0.00243825	0.636151	0	0	0	0.00287648	0.00445489	0	0.00272685	0	0.00453186	0.00286895	0	0.00642178	0.00188078	0.499129
CASSQDRAQSTGELFF	Flu_M_A2	6	7	3	76	9	13	33	10	19	23	1	4	39	138	0.0256016	0.00603559	0.0284589	0.0233653	0.0115238	0.0728709	0.0100235	0.0388315	0.0299954	0.0270241	0.0172211	0.0219953	0.00452018	0.0256871	0.0366752	0.179375
CAWSVMWGRGYTF	Flu_M_A2	7	2	0	63	12	34	44	20	57	41	0	3	25	155	0.0572989	0	0.0332021	0.00667579	0	0.0604062	0.0133647	0.101559	0.0399938	0.0540482	0.0516632	0.0392089	0	0.0192653	0.0235097	0.201471
CAWINGGGNTIYF	Flu_M_A2	0	0	0	4	15	0	4	0	6	3	0	0	5	14	0.00121913	0	0	0	0	0.00383531	0.0167058	0	0.0036358	0	0.00543823	0.00286895	0	0	0.00470194	0.0181974

## Sheet: reference_comp_only
sequence	FDR: EBV_EBNA_3_B8_vs_No_Pep	FDR: EBV_BZLF1_B8_vs_No_Pep	FDR: BMLF1_A2_vs_No_Pep	FDR: EBV_EBNA_3A_B8_vs_No_Pep	FDR: Flu_NP_B8_vs_No_Pep	FDR: EBV1_A11_vs_No_Pep	FDR: pp65_A2_vs_No_Pep	FDR: LMP2A_A2_vs_No_Pep	FDR: Flu_A_A2_vs_No_Pep	FDR: EBV_EBNA_4NP_A11_vs_No_Pep	FDR: EBV2_A11_vs_No_Pep	FDR: Flu_M_A11_vs_No_Pep	FDR: Flu_M_A2_vs_No_Pep	significant_comparisons	OR: EBV_EBNA_3_B8_vs_No_Pep	OR: EBV_BZLF1_B8_vs_No_Pep	OR: BMLF1_A2_vs_No_Pep	OR: EBV_EBNA_3A_B8_vs_No_Pep	OR: Flu_NP_B8_vs_No_Pep	OR: EBV1_A11_vs_No_Pep	OR: pp65_A2_vs_No_Pep	OR: LMP2A_A2_vs_No_Pep	OR: Flu_A_A2_vs_No_Pep	OR: EBV_EBNA_4NP_A11_vs_No_Pep	OR: EBV2_A11_vs_No_Pep	OR: Flu_M_A11_vs_No_Pep	OR: Flu_M_A2_vs_No_Pep	EBV_EBNA_3_B8_abundance	Pool_abundance	EBV_BZLF1_B8_abundance	BMLF1_A2_abundance	EBV_EBNA_3A_B8_abundance	Flu_NP_B8_abundance	baseline_abundance	EBV1_A11_abundance	pp65_A2_abundance	LMP2A_A2_abundance	Flu_A_A2_abundance	No_Pep_abundance	EBV_EBNA_4NP_A11_abundance	EBV2_A11_abundance	Flu_M_A11_abundance	Flu_M_A2_abundance	EBV_EBNA_3_B8_percent	Pool_percent	EBV_BZLF1_B8_percent	BMLF1_A2_percent	EBV_EBNA_3A_B8_percent	Flu_NP_B8_percent
CASSQRRDELRSGANVLTF	0	#N/A	7.00233371297637e-72	4.02663722679723e-139	0.118347538515585	1	0.0810893021976918	0.834095065507227	1	#N/A	0.00647889886564408	9.49643065978522e-11	0.181690119391237	3	99.104	#N/A	17.222	31.466	1.58	0.947	1.671	1.113	1.005	#N/A	2.85	3.519	1.565	2489	851	9	162	256	52	82	10	58	13	35	33	3	14	118	38	3.034	1.027	0.043	0.541	0.983	0.05
CASSEHGTSGYNEQFF	1.28130294288371e-240	#N/A	2.99934237971849e-31	3.81121819335654e-30	0.000355395780729756	#N/A	0.57416736130488	#N/A	5.8099150574909e-06	#N/A	#N/A	0.458007592841839	#N/A	5	152.362	#N/A	34.389	35.555	5.181	#N/A	1.743	#N/A	6.636	#N/A	#N/A	1.967	#N/A	711	185	2	59	53	31	5	6	11	3	42	6	3	1	12	4	0.867	0.223	0.009	0.197	0.204	0.03
CASSLELAGGEQYF	2.46434391264306e-208	#N/A	6.46677581930896e-195	2.06810052042993e-146	0.228728445434072	#N/A	#N/A	#N/A	#N/A	#N/A	#N/A	5.39055188033075e-22	#N/A	4	43.522	#N/A	60.897	50.482	0.501	#N/A	#N/A	#N/A	#N/A	#N/A	#N/A	7.039	#N/A	678	1339	1	345	249	10	14	2	7	4	7	20	2	1	143	9	0.827	1.616	0.005	1.152	0.956	0.01
CASSVEGDFGTEAFF	1.72360167964754e-166	#N/A	1.9429661551701e-25	1.49140305250318e-35	#N/A	#N/A	0.961675408802372	#N/A	0.68016511096577	#N/A	#N/A	#N/A	#N/A	3	81.746	#N/A	22.733	32.216	#N/A	#N/A	1.188	#N/A	1.54	#N/A	#N/A	#N/A	#N/A	510	183	3	52	64	6	7	1	10	0	13	8	0	1	3	2	0.622	0.221	0.014	0.174	0.246	0.006
CASSYFRDSNSYEQYF	8.44679165725578e-143	#N/A	7.81807827043116e-12	#N/A	#N/A	#N/A	#N/A	#N/A	0.468303974340089	#N/A	#N/A	#N/A	#N/A	2	109.929	#N/A	17.463	#N/A	#N/A	#N/A	#N/A	#N/A	2.085	#N/A	#N/A	#N/A	#N/A	429	326	0	25	7	1	5	0	1	1	11	5	0	1	3	2	0.523	0.394	0	0.083	0.027	0.001
CASSKGDRGHGEQYF	5.1507520010976e-12	#N/A	#N/A	#N/A	0.013217300473329	#N/A	#N/A	#N/A	#N/A	#N/A	#N/A	#N/A	#N/A	2	49.702	#N/A	#N/A	#N/A	12.037	#N/A	#N/A	#N/A	#N/A	#N/A	#N/A	#N/A	#N/A	39	3	1	0	1	12	6	0	8	2	0	1	0	0	1	2	0.048	0.004	0.005	0	0.004	0.012
CAWSVRGQKNTEAFF	0.000610656695548107	#N/A	#N/A	#N/A	0.013217300473329	#N/A	1.31297390003313e-08	#N/A	0.0430784980124995	#N/A	#N/A	#N/A	0.000534551186162481	5	17.857	#N/A	#N/A	#N/A	12.037	#N/A	34.228	#N/A	10.423	#N/A	#N/A	#N/A	19.032	14	0	3	1	0	12	19	2	36	4	11	1	1	2	7	14	0.017	0	0.014	0.003	0	0.012
CASRQGGGHEQYF	0.00226397201154304	#N/A	#N/A	#N/A	0.0970088323158371	#N/A	#N/A	#N/A	#N/A	#N/A	#N/A	0.0025347787128672	0.00202687985312165	3	5.737	#N/A	#N/A	#N/A	3.259	#N/A	#N/A	#N/A	#N/A	#N/A	#N/A	5.655	6.117	18	0	1	1	4	13	7	5	5	0	8	4	0	0	23	18	0.022	0	0.005	0.003	0.015	0.012
CASREGTGELFF	0.0300644652524321	#N/A	#N/A	#N/A	#N/A	#N/A	#N/A	#N/A	0.199918932308358	#N/A	#N/A	#N/A	#N/A	1	5.101	#N/A	#N/A	#N/A	#N/A	#N/A	#N/A	#N/A	3.475	#N/A	#N/A	#N/A	#N/A	12	1	2	4	1	5	17	1	4	6	11	3	5	1	8	7	0.015	0.001	0.009	0.013	0.004	0.005
CASSKRAAGGGNEQFF	0.24028210549341	0	#N/A	9.4951722478044e-55	0.553289817584647	0.564331493512863	0.555224247845432	0.677295855356101	0.824808291986882	#N/A	0.17862180962431	0.0391707916662778	0.94940480931553	2	0.622	128.807	#N/A	12.29	1.213	0.726	0.796	1.183	1.124	#N/A	1.718	0.503	1.043	21	3995	1061	6	131	52	66	10	36	18	51	43	1	11	22	33	0.026	4.822	5.032	0.02	0.503	0.05
CASSQAREYYNEQFF	0.00981543939721646	0	0.679307058635403	1.50598262860768e-89	0.826946932073686	0.540548003691274	0.961675408802372	0.0521616154968636	0.865198071027599	#N/A	#N/A	0.49668918662997	0.326538346466348	2	0.53	124.9	1.179	11.622	1.081	1.217	1.049	0.514	1.071	#N/A	#N/A	0.83	0.759	32	7687	1777	26	221	83	136	30	85	14	87	77	6	9	65	43	0.039	9.279	8.429	0.087	0.849	0.08
CASSQLPETYEQYF	#N/A	0	#N/A	8.28268603642649e-45	0.165490034992177	#N/A	0.0810893021976918	#N/A	0.284149903930471	#N/A	#N/A	0.00407373825413326	0.709680602272117	2	#N/A	146.535	#N/A	13.1	0.564	#N/A	0.505	#N/A	0.622	#N/A	#N/A	0.307	1.189	6	2724	903	3	104	18	49	6	17	7	21	32	2	7	10	28	0.007	3.288	4.283	0.01	0.399	0.017
CSGGQGEGEQYF	#N/A	6.20575337793334e-171	#N/A	2.23015480025495e-22	0.94770710438803	#N/A	#N/A	#N/A	0.725073403510476	#N/A	#N/A	0.572596077649546	0.924845153951679	2	#N/A	78.731	#N/A	12.823	0.877	#N/A	#N/A	#N/A	0.711	#N/A	#N/A	0.676	1.104	9	2404	251	4	51	14	24	4	9	5	12	16	0	4	11	13	0.011	2.902	1.191	0.013	0.196	0.013
CASSLRGGQETQYF	#N/A	4.18256120872396e-105	#N/A	4.04276589172902e-16	0.0786721037746835	#N/A	#N/A	8.85736572940384e-07	#N/A	#N/A	#N/A	0.0602969933898217	#N/A	3	#N/A	123.216	#N/A	20.774	2.841	#N/A	#N/A	9.423	#N/A	#N/A	#N/A	3.115	#N/A	1	234	148	3	31	17	8	1	5	20	8	6	0	1	19	6	0.001	0.282	0.702	0.01	0.119	0.016
CASSPGLERIYTGELFF	#N/A	4.18760628240646e-56	#N/A	5.43272893881288e-34	#N/A	#N/A	#N/A	#N/A	#N/A	#N/A	#N/A	#N/A	#N/A	2	#N/A	99.567	#N/A	56.353	#N/A	#N/A	#N/A	#N/A	#N/A	#N/A	#N/A	#N/A	#N/A	0	322	80	5	56	3	5	0	0	9	7	4	1	1	3	4	0	0.389	0.379	0.017	0.215	0.003
CSAILGGNEQFF	#N/A	9.47431664029677e-39	#N/A	9.65749374994101e-16	#N/A	#N/A	#N/A	#N/A	#N/A	#N/A	#N/A	#N/A	#N/A	2	#N/A	258.085	#N/A	96.487	#N/A	#N/A	#N/A	#N/A	#N/A	#N/A	#N/A	#N/A	#N/A	1	244	52	4	24	2	5	0	1	1	1	1	0	0	5	0	0.001	0.295	0.247	0.013	0.092	0.002
CASSPGQGGDYEQYF	#N/A	9.10112548164826e-38	#N/A	1.05810585338025e-23	#N/A	#N/A	#N/A	7.99566758867359e-07	#N/A	#N/A	#N/A	#N/A	#N/A	3	#N/A	89.5	#N/A	52.294	#N/A	#N/A	#N/A	16.026	#N/A	#N/A	#N/A	#N/A	#N/A	0	226	54	1	39	7	9	1	5	17	6	3	0	1	6	8	0	0.273	0.256	0.003	0.15	0.007
CASSLSASGDQPQHF	#N/A	3.95175355445492e-23	#N/A	#N/A	#N/A	#N/A	#N/A	#N/A	#N/A	#N/A	#N/A	#N/A	#N/A	1	#N/A	81.961	#N/A	#N/A	#N/A	#N/A	#N/A	#N/A	#N/A	#N/A	#N/A	#N/A	#N/A	1	112	33	0	4	5	4	1	2	2	2	2	0	0	2	6	0.001	0.135	0.157	0	0.015	0.005
CASSSLNTEAFF	#N/A	3.74220550624076e-21	#N/A	5.50655002446216e-05	#N/A	#N/A	#N/A	#N/A	#N/A	#N/A	#N/A	#N/A	#N/A	2	#N/A	28.959	#N/A	8.037	#N/A	#N/A	#N/A	#N/A	#N/A	#N/A	#N/A	#N/A	#N/A	3	101	35	0	12	0	5	1	1	0	3	6	0	0	2	2	0.004	0.122	0.166	0	0.046	0
CASSPGLGTDTQYF	#N/A	2.86545952890901e-14	#N/A	2.87627101103917e-06	#N/A	#N/A	#N/A	#N/A	#N/A	#N/A	#N/A	#N/A	#N/A	2	#N/A	52.132	#N/A	22.091	#N/A	#N/A	#N/A	#N/A	#N/A	#N/A	#N/A	#N/A	#N/A	0	14	21	1	11	5	5	0	3	2	4	2	0	1	3	1	0	0.017	0.1	0.003	0.042	0.005
CASSPLSAGWPGELFF	#N/A	1.77766601185921e-13	#N/A	4.14619447908697e-05	#N/A	#N/A	#N/A	#N/A	#N/A	#N/A	#N/A	#N/A	#N/A	2	#N/A	34.77	#N/A	13.391	#N/A	#N/A	#N/A	#N/A	#N/A	#N/A	#N/A	#N/A	#N/A	0	174	21	0	10	3	4	0	1	1	2	3	0	0	1	4	0	0.21	0.1	0	0.038	0.003
CSVANSDTDTQYF	#N/A	3.92457963739323e-12	#N/A	#N/A	#N/A	#N/A	#N/A	#N/A	#N/A	#N/A	#N/A	#N/A	#N/A	1	#N/A	44.682	#N/A	#N/A	#N/A	#N/A	#N/A	#N/A	#N/A	#N/A	#N/A	#N/A	#N/A	0	102	18	0	9	1	5	1	3	1	1	2	0	0	0	1	0	0.123	0.085	0	0.035	0.001
CASSLIHGGTEAFF	#N/A	2.05464588020809e-10	#N/A	#N/A	#N/A	#N/A	#N/A	#N/A	#N/A	#N/A	#N/A	#N/A	#N/A	1	#N/A	Inf	#N/A	#N/A	#N/A	#N/A	#N/A	#N/A	#N/A	#N/A	#N/A	#N/A	#N/A	1	159	13	0	4	1	4	0	7	1	0	0	0	1	0	1	0.001	0.192	0.062	0	0.015	0.001
CASGQGNQDTQYF	0.24028210549341	0.0482005105366175	0	0	0.0292776012187567	0.0954038354208184	1.97464265589965e-237	2.95699116178632e-32	0.75695418292579	1.78372810455237e-07	1	1.86492826374555e-05	0.924845153951679	3	0.815	1.407	42.473	47.871	0.734	1.353	7.477	3.321	0.933	0.243	1.004	0.567	1.023	124	1343	55	2192	2127	142	406	84	1508	227	191	194	10	29	112	146	0.151	1.621	0.261	7.317	8.17	0.136
CSVGTGGTNEKLFF	0.765739928765144	#N/A	0	3.75237072172644e-62	0.124117734641662	#N/A	0.000173590531869927	#N/A	#N/A	#N/A	#N/A	#N/A	0.559755178436513	2	1.416	#N/A	286.315	47.498	2.228	#N/A	4.225	#N/A	#N/A	#N/A	#N/A	#N/A	1.51	10	835	3	721	106	20	10	2	40	4	8	9	1	0	8	10	0.012	1.008	0.014	2.407	0.407	0.019
CSARDRVGNTIYF	0.268898281451428	#N/A	2.41597184406278e-282	#N/A	#N/A	#N/A	#N/A	#N/A	#N/A	#N/A	#N/A	#N/A	#N/A	1	2.337	#N/A	266.179	#N/A	#N/A	#N/A	#N/A	#N/A	#N/A	#N/A	#N/A	#N/A	#N/A	11	670	1	451	4	0	12	1	4	1	4	6	1	0	7	3	0.013	0.809	0.005	1.505	0.015	0
CASSLGRQGQGSYEQYF	0.443840090687341	#N/A	1.93728317384679e-193	0	0.101180679352314	#N/A	1.30288655063355e-09	0.359869142211673	0.726442888061843	#N/A	#N/A	0.79854565940372	#N/A	2	1.575	#N/A	69.965	323.249	1.888	#N/A	4.643	1.662	0.725	#N/A	#N/A	1.215	#N/A	21	1627	2	337	1301	32	26	4	83	10	13	17	1	1	21	7	0.026	1.964	0.009	1.125	4.998	0.031
CASSQGQAYEQYF	6.6894881847984e-06	#N/A	8.39679680762049e-111	3.23158285087914e-203	0.000356741909252998	0.0228829453403038	1.52698157234335e-09	0.635378323115774	4.54605836712301e-06	#N/A	#N/A	0.00213552898929315	0.00085747498799876	2	0.366	#N/A	11.051	18.533	0.469	0.465	2.176	1.142	0.383	#N/A	#N/A	0.533	0.462	27	316	6	295	427	44	86	14	215	38	38	94	1	8	51	32	0.033	0.381	0.028	0.985	1.64	0.042
CSAITDRANDQPQHF	#N/A	#N/A	2.85982194308527e-39	#N/A	#N/A	#N/A	#N/A	#N/A	#N/A	#N/A	#N/A	#N/A	#N/A	1	#N/A	#N/A	113.336	#N/A	#N/A	#N/A	#N/A	#N/A	#N/A	#N/A	#N/A	#N/A	#N/A	0	1	0	65	3	7	9	2	1	1	3	2	0	1	3	2	0	0.001	0	0.217	0.012	0.007
CASSGGGLSYEQYF	#N/A	#N/A	5.82276548217627e-13	0.182356036802983	1	#N/A	0.967002240554697	2.66305888061932e-249	0.624994588202907	#N/A	#N/A	#N/A	0.782931815135229	2	#N/A	#N/A	6.671	1.826	1.003	#N/A	0.95	63.637	0.732	#N/A	#N/A	#N/A	0.803	7	59	1	42	10	22	17	6	22	489	17	22	0	1	1	13	0.009	0.071	0.005	0.14	0.038	0.021
CASSLSGQGRLNTEAFF	#N/A	#N/A	0.00193848982317317	#N/A	#N/A	#N/A	#N/A	#N/A	#N/A	#N/A	#N/A	#N/A	#N/A	1	#N/A	#N/A	5.819	#N/A	#N/A	#N/A	#N/A	#N/A	#N/A	#N/A	#N/A	#N/A	#N/A	1	0	1	10	0	4	5	1	3	1	5	6	1	0	1	7	0.001	0	0.005	0.033	0	0.004
CASSLGNTIYF	#N/A	#N/A	#N/A	#N/A	2.05482798628967e-182	3.29773800384608e-268	#N/A	1.75604181252061e-170	#N/A	#N/A	3.20759671835971e-19	#N/A	#N/A	4	#N/A	#N/A	#N/A	#N/A	313.671	692.713	#N/A	431.903	#N/A	#N/A	84.075	#N/A	#N/A	6	0	0	0	0	624	4	444	1	301	4	2	0	25	6	2	0.007	0	0	0	0	0.598
CASSLGETQYF	0.765739928765144	#N/A	#N/A	#N/A	5.13928506391409e-94	#N/A	0.644226311468235	#N/A	#N/A	#N/A	#N/A	0.132484355783596	#N/A	1	1.416	#N/A	#N/A	#N/A	40.802	#N/A	1.479	#N/A	#N/A	#N/A	#N/A	2.295	#N/A	10	2	2	3	4	365	4	5	14	5	9	9	1	0	21	4	0.012	0.002	0.009	0.01	0.015	0.35
CASSKNVREVYGYTF	#N/A	#N/A	#N/A	#N/A	2.7132449793463e-09	#N/A	0.961675408802372	#N/A	1	#N/A	#N/A	0.000112599187143194	#N/A	1	#N/A	#N/A	#N/A	#N/A	6.019	#N/A	0.864	#N/A	1.034	#N/A	#N/A	3.934	#N/A	6	0	0	1	1	66	4	1	10	4	12	11	0	4	44	8	0.007	0	0	0.003	0.004	0.063
CASTNTWVSTDTQYF	#N/A	#N/A	#N/A	#N/A	1.45973655282325e-06	#N/A	#N/A	#N/A	#N/A	#N/A	#N/A	#N/A	#N/A	1	#N/A	#N/A	#N/A	#N/A	Inf	#N/A	#N/A	#N/A	#N/A	#N/A	#N/A	#N/A	#N/A	3	0	0	0	0	24	4	1	4	0	1	0	0	0	0	3	0.004	0	0	0	0	0.023
CASSLAGLITDTQYF	#N/A	#N/A	#N/A	#N/A	6.06831556336382e-05	#N/A	#N/A	#N/A	#N/A	#N/A	#N/A	#N/A	#N/A	1	#N/A	#N/A	#N/A	#N/A	12.539	#N/A	#N/A	#N/A	#N/A	#N/A	#N/A	#N/A	#N/A	0	0	2	0	0	25	5	1	1	1	2	2	0	0	1	1	0	0	0.009	0	0	0.024
CASALHMNTEAFF	#N/A	#N/A	#N/A	#N/A	0.000102010929103576	#N/A	#N/A	#N/A	#N/A	#N/A	#N/A	#N/A	#N/A	1	#N/A	#N/A	#N/A	#N/A	21.061	#N/A	#N/A	#N/A	#N/A	#N/A	#N/A	#N/A	#N/A	4	0	0	1	1	21	7	0	6	0	0	1	0	0	3	5	0.005	0	0	0.003	0.004	0.02
CAIGTDSNQPQHF	#N/A	#N/A	#N/A	#N/A	0.000129109115290792	#N/A	0.00665623897061894	#N/A	0.0109532154888904	#N/A	#N/A	0.000320402105216724	#N/A	4	#N/A	#N/A	#N/A	#N/A	Inf	#N/A	Inf	#N/A	Inf	#N/A	#N/A	Inf	#N/A	7	2	1	3	1	17	15	2	11	4	11	0	2	3	16	6	0.009	0.002	0.005	0.01	0.004	0.016
CASSLAPGVTEAFF	#N/A	#N/A	#N/A	#N/A	0.000233950878351913	#N/A	#N/A	#N/A	#N/A	#N/A	#N/A	#N/A	#N/A	1	#N/A	#N/A	#N/A	#N/A	Inf	#N/A	#N/A	#N/A	#N/A	#N/A	#N/A	#N/A	#N/A	0	0	0	0	0	16	5	0	0	0	0	0	0	0	1	0	0	0	0	0	0	0.015
CASTGPARDTIYF	#N/A	#N/A	#N/A	#N/A	0.000233950878351913	#N/A	#N/A	#N/A	#N/A	#N/A	#N/A	#N/A	#N/A	1	#N/A	#N/A	#N/A	#N/A	Inf	#N/A	#N/A	#N/A	#N/A	#N/A	#N/A	#N/A	#N/A	6	0	0	1	1	16	8	1	3	7	9	0	0	1	6	3	0.007	0	0	0.003	0.004	0.015
CASSLANQPQHF	#N/A	#N/A	#N/A	#N/A	0.000789436573633891	#N/A	#N/A	#N/A	0.0906816764498039	#N/A	#N/A	#N/A	#N/A	1	#N/A	#N/A	#N/A	#N/A	5.415	#N/A	#N/A	#N/A	3.223	#N/A	#N/A	#N/A	#N/A	3	1	0	4	2	27	4	1	5	3	17	5	0	1	4	1	0.004	0.001	0	0.013	0.008	0.026
CASSFDRGSYEQYF	#N/A	#N/A	#N/A	#N/A	0.00130319423014864	#N/A	0.00311723644714768	#N/A	#N/A	#N/A	#N/A	#N/A	#N/A	2	#N/A	#N/A	#N/A	#N/A	9.526	#N/A	8.555	#N/A	#N/A	#N/A	#N/A	#N/A	#N/A	0	2	1	2	1	19	5	3	18	3	9	2	0	0	5	4	0	0.002	0.005	0.007	0.004	0.018
CASSLSGALSQYF	#N/A	#N/A	#N/A	#N/A	0.00383091184429707	#N/A	#N/A	#N/A	#N/A	#N/A	#N/A	#N/A	#N/A	1	#N/A	#N/A	#N/A	#N/A	8.523	#N/A	#N/A	#N/A	#N/A	#N/A	#N/A	#N/A	#N/A	4	1	1	1	3	17	5	5	7	2	4	2	0	1	4	4	0.005	0.001	0.005	0.003	0.012	0.016
CASSPHLTSGRNSYNEQFF	#N/A	#N/A	#N/A	#N/A	0.00383091184429707	#N/A	#N/A	#N/A	#N/A	#N/A	#N/A	#N/A	#N/A	1	#N/A	#N/A	#N/A	#N/A	8.523	#N/A	#N/A	#N/A	#N/A	#N/A	#N/A	#N/A	#N/A	0	0	0	1	0	17	4	2	3	3	1	2	0	1	7	4	0	0	0	0.003	0	0.016
CASSYGQSKEQYF	#N/A	#N/A	#N/A	#N/A	0.00427836975766657	#N/A	#N/A	#N/A	#N/A	#N/A	#N/A	#N/A	#N/A	1	#N/A	#N/A	#N/A	#N/A	Inf	#N/A	#N/A	#N/A	#N/A	#N/A	#N/A	#N/A	#N/A	3	0	0	2	0	11	4	0	0	0	0	0	0	0	7	5	0.004	0	0	0.007	0	0.011
CASSYRGLNTEAFF	#N/A	#N/A	#N/A	#N/A	0.00427836975766657	#N/A	#N/A	#N/A	#N/A	#N/A	#N/A	#N/A	#N/A	1	#N/A	#N/A	#N/A	#N/A	Inf	#N/A	#N/A	#N/A	#N/A	#N/A	#N/A	#N/A	#N/A	0	0	0	0	0	11	4	0	1	0	0	0	0	0	0	0	0	0	0	0	0	0.011
CASSPLSLTEAFF	#N/A	#N/A	#N/A	#N/A	0.00772675958311804	#N/A	#N/A	#N/A	0.0176525793958884	#N/A	#N/A	#N/A	#N/A	2	#N/A	#N/A	#N/A	#N/A	13.039	#N/A	#N/A	#N/A	12.325	#N/A	#N/A	#N/A	#N/A	5	0	4	2	1	13	10	4	3	2	13	1	0	0	8	8	0.006	0	0.019	0.007	0.004	0.012
CASSLARRSTYGYTF	#N/A	#N/A	#N/A	#N/A	0.013217300473329	#N/A	#N/A	#N/A	#N/A	#N/A	#N/A	#N/A	#N/A	1	#N/A	#N/A	#N/A	#N/A	12.037	#N/A	#N/A	#N/A	#N/A	#N/A	#N/A	#N/A	#N/A	0	0	0	0	0	12	6	0	5	1	0	1	0	1	2	0	0	0	0	0	0	0.012
CSAHRDNTGELFF	#N/A	#N/A	#N/A	#N/A	0.013217300473329	#N/A	#N/A	#N/A	0.0280298345164719	#N/A	#N/A	#N/A	#N/A	2	#N/A	#N/A	#N/A	#N/A	12.037	#N/A	#N/A	#N/A	11.378	#N/A	#N/A	#N/A	#N/A	1	0	0	1	2	12	14	5	5	1	12	1	0	3	6	1	0.001	0	0	0.003	0.008	0.012
CAWSVLYGGSTEQYF	#N/A	#N/A	#N/A	#N/A	0.0165968255508093	#N/A	#N/A	#N/A	#N/A	#N/A	#N/A	#N/A	#N/A	1	#N/A	#N/A	#N/A	#N/A	7.019	#N/A	#N/A	#N/A	#N/A	#N/A	#N/A	#N/A	#N/A	1	0	0	1	0	14	5	1	8	7	1	2	0	0	1	1	0.001	0	0	0.003	0	0.013
CASSLMSGPGELFF	#N/A	#N/A	#N/A	#N/A	0.017441470812886	#N/A	#N/A	#N/A	#N/A	#N/A	#N/A	#N/A	#N/A	1	#N/A	#N/A	#N/A	#N/A	5.348	#N/A	#N/A	#N/A	#N/A	#N/A	#N/A	#N/A	#N/A	6	0	5	2	2	16	10	3	9	5	5	3	0	0	8	9	0.007	0	0.024	0.007	0.008	0.015
CASSMASGENIQYF	#N/A	#N/A	#N/A	#N/A	0.017441470812886	#N/A	#N/A	#N/A	#N/A	#N/A	#N/A	#N/A	#N/A	1	#N/A	#N/A	#N/A	#N/A	5.348	#N/A	#N/A	#N/A	#N/A	#N/A	#N/A	#N/A	#N/A	3	0	0	0	1	16	4	1	3	0	3	3	0	1	1	6	0.004	0	0	0	0.004	0.015
CASSEDLTGSYEQYF	#N/A	#N/A	#N/A	#N/A	0.0217981609010084	#N/A	#N/A	#N/A	#N/A	#N/A	#N/A	#N/A	#N/A	1	#N/A	#N/A	#N/A	#N/A	11.027	#N/A	#N/A	#N/A	#N/A	#N/A	#N/A	#N/A	#N/A	4	0	0	0	0	11	7	1	4	0	4	1	0	0	3	1	0.005	0	0	0	0	0.011
CASSQDLGTGYTF	#N/A	#N/A	#N/A	#N/A	0.0217981609010084	#N/A	#N/A	#N/A	#N/A	#N/A	#N/A	0.0109469870635156	#N/A	2	#N/A	#N/A	#N/A	#N/A	11.027	#N/A	#N/A	#N/A	#N/A	#N/A	#N/A	12.788	#N/A	1	0	0	0	0	11	7	0	3	0	6	1	0	0	13	2	0.001	0	0	0	0	0.011
CATSSIDYNEQFF	#N/A	#N/A	#N/A	#N/A	0.0217981609010084	#N/A	#N/A	#N/A	#N/A	#N/A	#N/A	#N/A	#N/A	1	#N/A	#N/A	#N/A	#N/A	11.027	#N/A	#N/A	#N/A	#N/A	#N/A	#N/A	#N/A	#N/A	3	1	0	0	2	11	7	0	5	2	1	1	0	0	1	2	0.004	0.001	0	0	0.008	0.011
CASSRSYYEQYF	#N/A	#N/A	#N/A	#N/A	0.0257036046270499	#N/A	#N/A	#N/A	#N/A	#N/A	#N/A	#N/A	#N/A	1	#N/A	#N/A	#N/A	#N/A	5.013	#N/A	#N/A	#N/A	#N/A	#N/A	#N/A	#N/A	#N/A	3	0	2	2	0	15	4	9	0	1	6	3	0	0	8	3	0.004	0	0.009	0.007	0	0.014
CASSVGVRYEQYF	#N/A	#N/A	#N/A	#N/A	0.0338897293654176	#N/A	#N/A	#N/A	#N/A	#N/A	#N/A	#N/A	#N/A	1	#N/A	#N/A	#N/A	#N/A	10.026	#N/A	#N/A	#N/A	#N/A	#N/A	#N/A	#N/A	#N/A	1	0	0	0	0	10	16	1	1	0	0	1	0	0	3	2	0.001	0	0	0	0	0.01
CASTQRMNEKLFF	#N/A	#N/A	#N/A	#N/A	0.0364456829328416	#N/A	#N/A	#N/A	#N/A	#N/A	#N/A	#N/A	#N/A	1	#N/A	#N/A	#N/A	#N/A	6.016	#N/A	#N/A	#N/A	#N/A	#N/A	#N/A	#N/A	#N/A	0	1	0	4	1	12	9	5	1	0	1	2	0	0	3	0	0	0.001	0	0.013	0.004	0.012
CATQGRMNTEAFF	#N/A	#N/A	#N/A	#N/A	0.0364456829328416	#N/A	#N/A	#N/A	#N/A	#N/A	#N/A	#N/A	#N/A	1	#N/A	#N/A	#N/A	#N/A	6.016	#N/A	#N/A	#N/A	#N/A	#N/A	#N/A	#N/A	#N/A	7	4	1	0	2	12	18	0	8	0	6	2	1	0	2	1	0.009	0.005	0.005	0	0.008	0.012
CASSHGGRVYEQYF	#N/A	#N/A	#N/A	#N/A	#N/A	0.000110687337230946	#N/A	#N/A	#N/A	#N/A	#N/A	#N/A	#N/A	1	#N/A	#N/A	#N/A	#N/A	#N/A	5.625	#N/A	#N/A	#N/A	#N/A	#N/A	#N/A	#N/A	0	0	0	0	0	0	6	18	0	1	2	10	1	0	1	1	0	0	0	0	0	0
CASSPLPSKVGNTEAFF	#N/A	#N/A	#N/A	#N/A	#N/A	0.00106529167948484	0.26024872632453	#N/A	0.209921575412162	#N/A	#N/A	0.132484355783596	0.0459544391952535	1	#N/A	#N/A	#N/A	#N/A	#N/A	5.803	2.173	#N/A	2.302	#N/A	#N/A	2.529	3.107	2	0	5	3	2	9	23	13	16	7	17	7	0	1	18	16	0.002	0	0.024	0.01	0.008	0.009
CSAIAGGPGGEQYF	#N/A	#N/A	#N/A	#N/A	#N/A	#N/A	2.04034862756253e-19	#N/A	#N/A	#N/A	#N/A	#N/A	0.0108378452020753	2	#N/A	#N/A	#N/A	#N/A	#N/A	#N/A	20.927	#N/A	#N/A	#N/A	#N/A	#N/A	5.098	5	5	2	1	3	6	4	1	88	1	3	4	5	1	0	15	0.006	0.006	0.009	0.003	0.012	0.006
CASSLAAGYAYGYTF	#N/A	#N/A	#N/A	#N/A	#N/A	#N/A	2.99974544533981e-10	#N/A	#N/A	#N/A	#N/A	0.170538273880291	#N/A	1	#N/A	#N/A	#N/A	#N/A	#N/A	#N/A	7.079	#N/A	#N/A	#N/A	#N/A	2.185	#N/A	1	0	1	0	0	3	8	2	67	1	0	9	0	0	20	1	0.001	0	0.005	0	0	0.003
CASSRINEQYF	#N/A	#N/A	#N/A	#N/A	#N/A	#N/A	3.13605738255798e-06	#N/A	#N/A	#N/A	#N/A	#N/A	#N/A	1	#N/A	#N/A	#N/A	#N/A	#N/A	#N/A	Inf	#N/A	#N/A	#N/A	#N/A	#N/A	#N/A	1	0	0	0	0	1	4	0	23	0	0	0	0	4	6	0	0.001	0	0	0	0	0.001
CASSLRDTNYGYTF	#N/A	#N/A	#N/A	#N/A	#N/A	#N/A	2.20825621855119e-05	#N/A	#N/A	#N/A	#N/A	#N/A	#N/A	1	#N/A	#N/A	#N/A	#N/A	#N/A	#N/A	Inf	#N/A	#N/A	#N/A	#N/A	#N/A	#N/A	0	0	0	0	0	0	6	0	20	0	0	0	0	0	5	0	0	0	0	0	0	0
CASTKGRAANEKLFF	#N/A	#N/A	#N/A	#N/A	0.179596290480808	#N/A	0.00256144621975935	#N/A	0.235438645209379	#N/A	#N/A	#N/A	#N/A	1	#N/A	#N/A	#N/A	#N/A	2.758	#N/A	5.466	#N/A	2.843	#N/A	#N/A	#N/A	#N/A	0	0	0	2	1	11	5	5	23	4	12	4	0	0	5	1	0	0	0	0.007	0.004	0.011
CASSPSWNTEAFF	#N/A	#N/A	#N/A	#N/A	#N/A	#N/A	0.00354808231056182	#N/A	#N/A	#N/A	#N/A	#N/A	#N/A	1	#N/A	#N/A	#N/A	#N/A	#N/A	#N/A	Inf	#N/A	#N/A	#N/A	#N/A	#N/A	#N/A	2	0	0	0	0	3	6	1	12	0	0	0	1	0	3	3	0.002	0	0	0	0	0.003
CASSLGEKLFF	#N/A	#N/A	#N/A	#N/A	#N/A	#N/A	0.00867204078395107	#N/A	#N/A	#N/A	#N/A	#N/A	#N/A	1	#N/A	#N/A	#N/A	#N/A	#N/A	#N/A	7.605	#N/A	#N/A	#N/A	#N/A	#N/A	#N/A	0	0	0	0	0	2	5	0	16	0	0	2	0	0	1	1	0	0	0	0	0	0.002
CASSLQRNTEAFF	#N/A	#N/A	#N/A	#N/A	#N/A	#N/A	0.0116045992796806	#N/A	#N/A	#N/A	#N/A	#N/A	#N/A	1	#N/A	#N/A	#N/A	#N/A	#N/A	#N/A	12.36	#N/A	#N/A	#N/A	#N/A	#N/A	#N/A	0	0	0	0	0	2	4	2	13	0	0	1	0	0	2	4	0	0	0	0	0	0.002
CASSRRGGEGRAQHF	#N/A	#N/A	#N/A	#N/A	0.0826471826497012	#N/A	0.967002240554697	2.02646343933268e-42	#N/A	#N/A	1.17714850314296e-07	0.040326577884287	0.775641999029076	2	#N/A	#N/A	#N/A	#N/A	1.947	#N/A	1.062	17.505	#N/A	#N/A	7.513	2.141	1.199	8	1	1	1	1	33	12	6	19	105	9	17	0	19	37	15	0.01	0.001	0.005	0.003	0.004	0.032
CSVDRGNDNEQFF	#N/A	#N/A	#N/A	#N/A	#N/A	#N/A	#N/A	8.85736572940384e-07	#N/A	#N/A	#N/A	#N/A	#N/A	1	#N/A	#N/A	#N/A	#N/A	#N/A	#N/A	#N/A	7.774	#N/A	#N/A	#N/A	#N/A	#N/A	5	1	1	1	1	3	15	2	7	22	4	8	2	0	4	4	0.006	0.001	0.005	0.003	0.004	0.003
CASSPRMGAPDTQYF	#N/A	#N/A	#N/A	#N/A	#N/A	#N/A	#N/A	0.0063085128371339	#N/A	#N/A	#N/A	#N/A	#N/A	1	#N/A	#N/A	#N/A	#N/A	#N/A	#N/A	#N/A	5.653	#N/A	#N/A	#N/A	#N/A	#N/A	1	0	0	1	0	9	4	1	2	10	2	5	1	0	7	3	0.001	0	0	0.003	0	0.009
CASGGNIQYF	#N/A	#N/A	#N/A	#N/A	1	#N/A	#N/A	#N/A	2.7736181501156e-16	#N/A	#N/A	#N/A	#N/A	1	#N/A	#N/A	#N/A	#N/A	1.003	#N/A	#N/A	#N/A	8.537	#N/A	#N/A	#N/A	#N/A	9	0	1	0	4	11	9	1	6	2	99	11	0	0	5	6	0.011	0	0.005	0	0.015	0.011
CASSSGYSTYEQYF	#N/A	#N/A	#N/A	#N/A	#N/A	#N/A	#N/A	#N/A	0.000150925702447158	#N/A	#N/A	#N/A	0.0459544391952535	1	#N/A	#N/A	#N/A	#N/A	#N/A	#N/A	#N/A	#N/A	7.11	#N/A	#N/A	#N/A	4.078	4	0	0	2	1	4	8	1	1	1	30	4	0	0	7	12	0.005	0	0	0.007	0.004	0.004
CASSDGTGGFSGANVLTF	#N/A	#N/A	#N/A	#N/A	#N/A	#N/A	#N/A	#N/A	0.0109532154888904	#N/A	#N/A	#N/A	#N/A	1	#N/A	#N/A	#N/A	#N/A	#N/A	#N/A	#N/A	#N/A	13.273	#N/A	#N/A	#N/A	#N/A	1	0	1	0	1	2	8	1	3	0	14	1	0	1	4	1	0.001	0	0.005	0	0.004	0.002
CSASGTGLAILSSYNEQFF	#N/A	#N/A	#N/A	#N/A	#N/A	#N/A	#N/A	#N/A	0.0137957776257483	#N/A	#N/A	#N/A	#N/A	1	#N/A	#N/A	#N/A	#N/A	#N/A	#N/A	#N/A	#N/A	7.583	#N/A	#N/A	#N/A	#N/A	4	0	2	1	2	3	5	5	1	1	16	2	0	1	2	2	0.005	0	0.009	0.003	0.008	0.003
CASSSGQGGFNTEAFF	#N/A	#N/A	#N/A	#N/A	#N/A	#N/A	#N/A	#N/A	0.0176525793958884	#N/A	#N/A	0.0182473213407035	#N/A	2	#N/A	#N/A	#N/A	#N/A	#N/A	#N/A	#N/A	#N/A	12.325	#N/A	#N/A	11.805	#N/A	5	0	1	0	1	5	9	1	6	3	13	1	1	0	12	4	0.006	0	0.005	0	0.004	0.005
CASSIGGYEQYF	#N/A	#N/A	#N/A	#N/A	#N/A	#N/A	#N/A	#N/A	0.0430784980124995	#N/A	#N/A	#N/A	#N/A	1	#N/A	#N/A	#N/A	#N/A	#N/A	#N/A	#N/A	#N/A	10.423	#N/A	#N/A	#N/A	#N/A	1	0	0	0	1	4	6	0	0	1	11	1	0	0	1	2	0.001	0	0	0	0.004	0.004
CASSLAGGNEQFF	#N/A	#N/A	#N/A	#N/A	#N/A	#N/A	#N/A	#N/A	0.0481985669648277	#N/A	#N/A	#N/A	#N/A	1	#N/A	#N/A	#N/A	#N/A	#N/A	#N/A	#N/A	#N/A	6.161	#N/A	#N/A	#N/A	#N/A	3	0	0	0	0	2	4	1	0	0	13	2	0	0	2	2	0.004	0	0	0	0	0.002
CASSMGQASGANVLTF	#N/A	#N/A	#N/A	#N/A	0.0520935679337074	#N/A	#N/A	#N/A	0.0481985669648277	#N/A	#N/A	#N/A	#N/A	1	#N/A	#N/A	#N/A	#N/A	5.515	#N/A	#N/A	#N/A	6.161	#N/A	#N/A	#N/A	#N/A	9	0	3	0	1	11	31	1	6	4	13	2	2	1	9	7	0.011	0	0.014	0	0.004	0.011
CASSLTSAAGELFF	0.918872542904003	#N/A	1	0.747246574403274	0.546371525324138	1.97045642951206e-14	0.788396048103574	#N/A	0.468303974340089	0	#N/A	0.150221244378329	0.821178126732394	1	1.103	#N/A	1.007	1.159	1.196	4.332	0.877	#N/A	1.276	540.462	#N/A	0.643	1.098	45	14455	9	15	15	62	129	72	48	9	70	52	4693	6	34	42	0.055	17.449	0.043	0.05	0.058	0.059
CASSLTSATGELFF	0.00425620305384539	#N/A	0.460945329694653	0.690853515996961	0.00368549693346986	1.97045642951206e-14	0.00161583115754011	0.456046767189323	0.0710594268762401	0	0.592153445887446	0.000148930995643003	0.261751771295721	1	0.521	#N/A	0.753	0.821	0.524	3.379	0.518	0.771	0.657	247.411	1.221	0.447	0.757	36	13136	9	19	18	46	116	95	48	24	61	88	3829	16	40	49	0.044	15.857	0.043	0.063	0.069	0.044
CASSPTSATGELFF	0.644302997638288	#N/A	#N/A	#N/A	0.0520935679337074	#N/A	0.164793937383078	#N/A	0.808137826130555	0	#N/A	0.0175282411762509	0.140210869318646	1	0.728	#N/A	#N/A	#N/A	1.791	#N/A	0.543	#N/A	0.846	320.999	#N/A	0.351	0.485	16	7359	1	4	5	50	19	7	16	9	25	28	1754	1	10	10	0.02	8.883	0.005	0.013	0.019	0.048
CASSLKGTRDQETQYF	#N/A	#N/A	#N/A	#N/A	#N/A	#N/A	#N/A	#N/A	#N/A	7.61900160341339e-275	#N/A	#N/A	#N/A	1	#N/A	#N/A	#N/A	#N/A	#N/A	#N/A	#N/A	#N/A	#N/A	Inf	#N/A	#N/A	#N/A	0	1092	1	2	1	5	5	1	3	0	9	0	361	1	1	1	0	1.318	0.005	0.007	0.004	0.005
CASSLSYEQYF	#N/A	#N/A	#N/A	#N/A	#N/A	#N/A	#N/A	#N/A	#N/A	7.59576540463342e-21	#N/A	#N/A	#N/A	1	#N/A	#N/A	#N/A	#N/A	#N/A	#N/A	#N/A	#N/A	#N/A	32.206	#N/A	#N/A	#N/A	9	2	1	1	1	1	6	1	2	6	3	5	34	0	0	2	0.011	0.002	0.005	0.003	0.004	0.001
CAISERQGSYGYTF	#N/A	#N/A	#N/A	#N/A	0.0520935679337074	#N/A	#N/A	#N/A	#N/A	#N/A	#N/A	6.98121396080461e-23	#N/A	1	#N/A	#N/A	#N/A	#N/A	5.515	#N/A	#N/A	#N/A	#N/A	#N/A	#N/A	44.78	#N/A	4	1	0	1	1	11	8	0	5	0	5	2	0	1	91	1	0.005	0.001	0	0.003	0.004	0.011
CASSLRPIGTVYEQYF	#N/A	#N/A	#N/A	#N/A	#N/A	#N/A	#N/A	#N/A	#N/A	#N/A	#N/A	1.27546368099487e-07	#N/A	1	#N/A	#N/A	#N/A	#N/A	#N/A	#N/A	#N/A	#N/A	#N/A	#N/A	#N/A	7.706	#N/A	0	0	0	1	7	4	4	1	1	0	3	6	0	0	47	7	0	0	0	0.003	0.027	0.004
CASSSGRGSTEQYF	#N/A	#N/A	#N/A	#N/A	#N/A	#N/A	#N/A	#N/A	#N/A	#N/A	#N/A	0.00206718589192104	#N/A	1	#N/A	#N/A	#N/A	#N/A	#N/A	#N/A	#N/A	#N/A	#N/A	#N/A	#N/A	9.343	#N/A	1	0	0	0	0	1	4	0	0	0	4	2	0	0	19	4	0.001	0	0	0	0	0.001
CASSSSSYEQYF	#N/A	#N/A	#N/A	#N/A	#N/A	#N/A	#N/A	#N/A	#N/A	#N/A	#N/A	0.0038312618079444	#N/A	1	#N/A	#N/A	#N/A	#N/A	#N/A	#N/A	#N/A	#N/A	#N/A	#N/A	#N/A	Inf	#N/A	1	0	1	0	1	3	4	0	1	0	1	0	0	0	12	0	0.001	0	0.005	0	0.004	0.003
CASSLGRPTGELFF	#N/A	#N/A	#N/A	#N/A	#N/A	#N/A	#N/A	#N/A	#N/A	#N/A	#N/A	0.009375974632246	#N/A	1	#N/A	#N/A	#N/A	#N/A	#N/A	#N/A	#N/A	#N/A	#N/A	#N/A	#N/A	5.901	#N/A	3	2	1	1	1	9	11	1	6	2	1	3	2	0	18	6	0.004	0.002	0.005	0.003	0.004	0.009
CASSSRDTNSYEQYF	#N/A	#N/A	#N/A	#N/A	#N/A	#N/A	#N/A	#N/A	0.10462503909777	#N/A	#N/A	0.0150734727003292	3.01658731745552e-13	2	#N/A	#N/A	#N/A	#N/A	#N/A	#N/A	#N/A	#N/A	4.107	#N/A	#N/A	5.573	21.306	2	0	0	1	1	6	9	3	3	1	13	3	4	0	17	47	0.002	0	0	0.003	0.004	0.006
CASSLYPGLAGVETQYF	#N/A	#N/A	#N/A	#N/A	#N/A	#N/A	#N/A	#N/A	#N/A	#N/A	#N/A	0.0182473213407035	#N/A	1	#N/A	#N/A	#N/A	#N/A	#N/A	#N/A	#N/A	#N/A	#N/A	#N/A	#N/A	11.805	#N/A	1	0	0	0	0	1	5	0	4	0	0	1	0	3	12	1	0.001	0	0	0	0	0.001
CASSPSGLLWQFF	#N/A	#N/A	#N/A	#N/A	#N/A	#N/A	#N/A	#N/A	0.164682957108687	#N/A	#N/A	0.0214258144641967	#N/A	1	#N/A	#N/A	#N/A	#N/A	#N/A	#N/A	#N/A	#N/A	4.739	#N/A	#N/A	6.884	#N/A	7	0	0	0	5	7	8	6	4	1	10	2	1	3	14	8	0.009	0	0	0	0.019	0.007
CASSVGGGTEAFF	#N/A	#N/A	#N/A	#N/A	#N/A	#N/A	#N/A	#N/A	#N/A	#N/A	#N/A	0.0294756281011758	#N/A	1	#N/A	#N/A	#N/A	#N/A	#N/A	#N/A	#N/A	#N/A	#N/A	#N/A	#N/A	10.815	#N/A	1	0	2	3	3	1	4	1	7	1	3	1	0	0	11	6	0.001	0	0.009	0.01	0.012	0.001
CASSIRSSYEQYF	#N/A	#N/A	#N/A	#N/A	#N/A	#N/A	#N/A	#N/A	#N/A	#N/A	#N/A	#N/A	7.91337914570298e-136	1	#N/A	#N/A	#N/A	#N/A	#N/A	#N/A	#N/A	#N/A	#N/A	#N/A	#N/A	#N/A	174.859	2	527	0	0	0	3	4	0	3	0	5	3	0	1	2	384	0.002	0.636	0	0	0	0.003
CASSQDRAQSTGELFF	0.901124144926248	#N/A	#N/A	#N/A	1.44777482119719e-06	0.257569254215279	0.536376757601644	0.677295855356101	0.725073403510476	#N/A	#N/A	0.161476302491503	2.31342257674194e-28	1	1.164	#N/A	#N/A	#N/A	3.315	1.766	1.364	1.229	0.783	#N/A	#N/A	1.668	8.167	21	5	6	7	3	76	9	13	33	10	19	23	1	4	39	138	0.026	0.006	0.028	0.023	0.012	0.073
CAWSVMWGRGYTF	0.252629259396437	#N/A	#N/A	#N/A	0.0973034727732478	0.000606741219109863	1	0.401278890499785	0.45482122292436	#N/A	#N/A	0.143973918451569	3.57759609320731e-24	1	1.462	#N/A	#N/A	#N/A	1.541	2.592	1.02	1.379	1.318	#N/A	#N/A	0.6	5.147	47	0	7	2	0	63	12	34	44	20	57	41	0	3	25	155	0.057	0	0.033	0.007	0	0.06
CATSRERWTNTEAFF	0.0163089586154591	#N/A	0.0320619837222876	#N/A	0.000391690873669108	0.19968495072461	1.82730366028809e-08	7.99566758867359e-07	0.00717183431081793	#N/A	#N/A	0.134712057739836	7.55424302840702e-11	1	2.4	#N/A	2.67	#N/A	3.009	2.021	4.307	4.99	2.565	#N/A	#N/A	1.851	5.361	32	3	5	13	6	51	30	11	77	30	46	17	1	7	32	67	0.039	0.004	0.024	0.043	0.023	0.049
CASSYSPGANQPQHF	#N/A	#N/A	#N/A	#N/A	#N/A	#N/A	#N/A	#N/A	#N/A	#N/A	#N/A	#N/A	8.90596509739964e-11	1	#N/A	#N/A	#N/A	#N/A	#N/A	#N/A	#N/A	#N/A	#N/A	#N/A	#N/A	#N/A	46.183	4	1	1	1	0	1	5	0	1	1	6	1	0	8	8	34	0.005	0.001	0.005	0.003	0	0.001
CASRGRPEAFF	#N/A	#N/A	#N/A	#N/A	#N/A	#N/A	#N/A	#N/A	#N/A	#N/A	#N/A	#N/A	1.55608669428455e-05	1	#N/A	#N/A	#N/A	#N/A	#N/A	#N/A	#N/A	#N/A	#N/A	#N/A	#N/A	#N/A	25.83	4	0	0	1	0	1	5	0	1	1	4	1	0	1	1	19	0.005	0	0	0.003	0	0.001
CSVTGADGYTF	#N/A	#N/A	#N/A	#N/A	#N/A	#N/A	#N/A	#N/A	#N/A	#N/A	#N/A	#N/A	0.000133692191311276	1	#N/A	#N/A	#N/A	#N/A	#N/A	#N/A	#N/A	#N/A	#N/A	#N/A	#N/A	#N/A	21.751	1	0	1	1	0	3	8	1	6	0	0	1	0	2	0	16	0.001	0	0.005	0.003	0	0.003
CASSSGAHSYEQYF	#N/A	#N/A	#N/A	#N/A	#N/A	#N/A	#N/A	#N/A	#N/A	#N/A	#N/A	#N/A	0.000162295821086393	1	#N/A	#N/A	#N/A	#N/A	#N/A	#N/A	#N/A	#N/A	#N/A	#N/A	#N/A	#N/A	Inf	0	0	0	1	0	0	4	0	4	0	1	0	0	0	0	13	0	0	0	0.003	0	0
CSAREKGVLNYGYTF	#N/A	#N/A	#N/A	#N/A	0.41299694393552	#N/A	#N/A	#N/A	0.0430784980124995	#N/A	#N/A	#N/A	0.00027816808376077	1	#N/A	#N/A	#N/A	#N/A	1.838	#N/A	#N/A	#N/A	3.317	#N/A	#N/A	#N/A	5.666	7	1	4	2	1	11	5	3	7	3	21	6	0	1	5	25	0.009	0.001	0.019	0.007	0.004	0.011
CSARRGRRENTEAFF	#N/A	#N/A	#N/A	#N/A	#N/A	#N/A	#N/A	#N/A	#N/A	#N/A	#N/A	#N/A	0.00202687985312165	1	#N/A	#N/A	#N/A	#N/A	#N/A	#N/A	#N/A	#N/A	#N/A	#N/A	#N/A	#N/A	16.307	1	0	2	0	0	2	5	1	0	0	9	1	0	2	1	12	0.001	0	0.009	0	0	0.002
CAWINGGGNTIYF	#N/A	#N/A	#N/A	#N/A	#N/A	#N/A	#N/A	#N/A	#N/A	#N/A	#N/A	#N/A	0.00659337072824374	1	#N/A	#N/A	#N/A	#N/A	#N/A	#N/A	#N/A	#N/A	#N/A	#N/A	#N/A	#N/A	6.343	1	0	0	0	0	4	15	0	4	0	6	3	0	0	5	14	0.001	0	0	0	0	0.004
CAVHRDRSRTEAFF	#N/A	#N/A	#N/A	#N/A	#N/A	#N/A	#N/A	#N/A	#N/A	#N/A	#N/A	#N/A	0.0116903730280329	1	#N/A	#N/A	#N/A	#N/A	#N/A	#N/A	#N/A	#N/A	#N/A	#N/A	#N/A	#N/A	5.89	0	0	2	1	1	2	4	1	3	0	1	3	0	0	2	13	0	0	0.009	0.003	0.004	0.002
CASSEWVENTEAFF	#N/A	#N/A	#N/A	#N/A	0.0520935679337074	#N/A	#N/A	#N/A	#N/A	#N/A	#N/A	0.123873100544188	0.0308503035646756	1	#N/A	#N/A	#N/A	#N/A	5.515	#N/A	#N/A	#N/A	#N/A	#N/A	#N/A	4.917	6.796	4	0	0	0	3	11	21	1	8	1	8	2	0	0	10	10	0.005	0	0	0	0.012	0.011
[truncated: 10 more columns]

## Sheet: parameters
param	value
Reference_samp	No_Pep
Baseline_sample	baseline
nTemplates	10
FDR_threshold	0.05
OR_threshold	5
Ignore_baseline_threshold	FALSE
confidence	0.99
nCells	120000
