# Supplementary material for: The Mutation-Associated Neoantigen Functional Expansion of Specific T Cells (MANAFEST) Assay: A Sensitive Platform for Monitoring Antitumor Immunity
Source: Oxford University Press journal article supplement (doi:10.1158/2326-6066.cir-18-0129), 2018-06-12
Supplement: 23266066cir180129-sup-197967_2_supp_4765731_p8w2bb.xlsx [file 23266066cir180129-sup-197967_2_supp_4765731_p8w2bb.xlsx]

## Sheet: peptide_summary
	positive_clones	sum_freq
JH124_06	1	1.57895
JH124_07	3	6.84564
JH124_09	1	6.36261
JH124_30	1	2.06131

## Sheet: positive_clones_summary
	condition	JH124_D-3_PBMC_percent	FC:JH124_D-3_PBMC	JH124_NoPep_percent	FC:JH124_NoPep
CASSLSGTGYHEQYF	JH124_06	0.0547476	29	0	23
CASSGTTYGYTF	JH124_09	0.0171086	372	0	92
CASSLQGGMGNQPQHF	JH124_30	0.011976	172	0	30
CASSLTGGYTGELFF	JH124_07	0.0171086	288	0.068918	71
CASNKLGYQPQHF	JH124_07	0.0136869	85	0.137836	8
CASSLLENQPQHF	JH124_07	0.0102652	74	0	11

## Sheet: all_sample_data
	condition	JH124_58_abundance	JH124_29_abundance	JH124_25_abundance	JH124_CEF_abundance	JH124_35_abundance	JH124_02_abundance	JH124_45_abundance	JH124_03_abundance	JH124_06_abundance	JH124_44_abundance	JH124_09_abundance	JH124_54_abundance	JH124_24_abundance	JH124_23_abundance	JH124_26_abundance	JH124_08_abundance	JH124_63_abundance	JH124_3_D+447_abundance	JH124_57_abundance	JH124_3_D+422_abundance	JH124_36_abundance	JH124_53_abundance	JH124_50_abundance	JH124_55_abundance	JH124_59_abundance	JH124_05_abundance	JH124_04_abundance	JH124_48_abundance	JH124_20_abundance	JH124_10_abundance	JH124_52_abundance	JH124_NoPep_abundance	JH124_27_abundance	JH124_34_abundance	JH124_3_D+44_abundance	JH124_47_abundance	JH124_49_abundance	JH124_30_abundance	JH124_51_abundance	JH124_18_abundance	JH124_61_abundance	JH124_37_abundance	JH124_62_abundance	JH124_28_abundance	JH124_43_abundance	JH124_19_abundance	JH124_56_abundance	JH124_38_abundance
CASSLSGTGYHEQYF	JH124_06	1	1	0	0	5	0	3	1	21	0	2	1	0	4	4	9	3	20	2	18	0	1	0	2	6	11	2	1	0	0	7	0	3	1	36	7	1	1	2	5	0	1	1	0	0	4	5	3
CASSGTTYGYTF	JH124_09	0	0	0	0	0	0	0	0	0	0	113	0	0	0	0	0	0	4	0	11	0	0	0	0	0	0	0	0	0	0	0	0	0	0	27	0	0	0	0	0	0	0	0	2	0	0	0	0
CASSLQGGMGNQPQHF	JH124_30	0	0	1	0	0	0	0	2	0	0	0	1	0	0	0	0	0	2	1	1	0	0	1	0	0	0	0	0	0	0	2	0	0	0	11	0	0	39	5	0	0	0	0	0	0	0	0	0
CASSLTGGYTGELFF	JH124_07	0	2	0	0	1	2	4	0	0	0	2	2	3	3	0	0	4	1	1	0	0	6	2	1	4	4	0	1	0	0	1	1	0	1	4	3	1	0	0	0	1	1	0	1	1	0	3	1
CASNKLGYQPQHF	JH124_07	2	0	0	0	0	0	4	0	0	2	0	0	0	0	0	0	7	0	0	0	0	2	0	0	0	0	0	0	2	0	0	2	0	0	7	0	0	0	0	0	0	0	0	0	0	1	2	0
CASSLLENQPQHF	JH124_07	0	0	0	0	0	0	0	0	0	3	1	0	0	0	1	1	0	0	0	0	2	0	0	2	0	1	0	2	0	0	0	0	0	0	1	0	2	1	0	0	0	1	0	0	0	0	0	0
[truncated: 76 more columns]

## Sheet: reference_comp_only
sequence	FDR: JH124_58_vs_JH124_NoPep	FDR: JH124_29_vs_JH124_NoPep	FDR: JH124_25_vs_JH124_NoPep	FDR: JH124_CEF_vs_JH124_NoPep	FDR: JH124_35_vs_JH124_NoPep	FDR: JH124_02_vs_JH124_NoPep	FDR: JH124_45_vs_JH124_NoPep	FDR: JH124_03_vs_JH124_NoPep	FDR: JH124_06_vs_JH124_NoPep	FDR: JH124_44_vs_JH124_NoPep	FDR: JH124_09_vs_JH124_NoPep	FDR: JH124_54_vs_JH124_NoPep	FDR: JH124_24_vs_JH124_NoPep	FDR: JH124_23_vs_JH124_NoPep	FDR: JH124_26_vs_JH124_NoPep	FDR: JH124_08_vs_JH124_NoPep	FDR: JH124_63_vs_JH124_NoPep	FDR: JH124_57_vs_JH124_NoPep	FDR: JH124_36_vs_JH124_NoPep	FDR: JH124_53_vs_JH124_NoPep	FDR: JH124_50_vs_JH124_NoPep	FDR: JH124_55_vs_JH124_NoPep	FDR: JH124_59_vs_JH124_NoPep	FDR: JH124_05_vs_JH124_NoPep	FDR: JH124_04_vs_JH124_NoPep	FDR: JH124_48_vs_JH124_NoPep	FDR: JH124_20_vs_JH124_NoPep	FDR: JH124_10_vs_JH124_NoPep	FDR: JH124_52_vs_JH124_NoPep	FDR: JH124_27_vs_JH124_NoPep	FDR: JH124_34_vs_JH124_NoPep	FDR: JH124_47_vs_JH124_NoPep	FDR: JH124_49_vs_JH124_NoPep	FDR: JH124_30_vs_JH124_NoPep	FDR: JH124_51_vs_JH124_NoPep	FDR: JH124_18_vs_JH124_NoPep	FDR: JH124_61_vs_JH124_NoPep	FDR: JH124_37_vs_JH124_NoPep	FDR: JH124_62_vs_JH124_NoPep	FDR: JH124_28_vs_JH124_NoPep	FDR: JH124_43_vs_JH124_NoPep	FDR: JH124_19_vs_JH124_NoPep	FDR: JH124_56_vs_JH124_NoPep	FDR: JH124_38_vs_JH124_NoPep	FDR: JH124_33_vs_JH124_NoPep	FDR: JH124_46_vs_JH124_NoPep	FDR: JH124_60_vs_JH124_NoPep	FDR: JH124_07_vs_JH124_NoPep	significant_comparisons
CASSLEESKQYF	0.000226168479828613	#N/A	#N/A	#N/A	#N/A	#N/A	#N/A	#N/A	#N/A	0.241321329870148	#N/A	0.086289109919628	0.158405892178172	0.0113621502646408	0.20633848086154	#N/A	#N/A	0.037632935232393	#N/A	#N/A	0.205649157980823	0.0309181058319357	#N/A	#N/A	#N/A	#N/A	#N/A	#N/A	0.308352466439887	#N/A	#N/A	#N/A	0.481198729284821	#N/A	#N/A	#N/A	0.011290063962316	0.37799681389557	#N/A	#N/A	#N/A	#N/A	0.47115946959633	0.251886987260114	#N/A	#N/A	#N/A	#N/A	5
CASSPRGSNQPQHF	#N/A	#N/A	#N/A	#N/A	#N/A	#N/A	0.0298873835318039	#N/A	#N/A	#N/A	#N/A	#N/A	#N/A	#N/A	#N/A	#N/A	#N/A	#N/A	#N/A	#N/A	#N/A	0.0309181058319357	#N/A	#N/A	#N/A	#N/A	#N/A	#N/A	#N/A	#N/A	#N/A	#N/A	#N/A	#N/A	#N/A	#N/A	#N/A	#N/A	#N/A	#N/A	#N/A	#N/A	0.0912269780645082	#N/A	#N/A	#N/A	#N/A	#N/A	2
CASSLSGTGYHEQYF	#N/A	#N/A	#N/A	#N/A	#N/A	#N/A	#N/A	#N/A	1.20700582596595e-06	#N/A	#N/A	#N/A	#N/A	#N/A	#N/A	#N/A	#N/A	#N/A	#N/A	#N/A	#N/A	#N/A	#N/A	0.0630890167265864	#N/A	#N/A	#N/A	#N/A	#N/A	#N/A	#N/A	#N/A	#N/A	#N/A	#N/A	#N/A	#N/A	#N/A	#N/A	#N/A	#N/A	#N/A	#N/A	#N/A	#N/A	#N/A	#N/A	#N/A	1
CASSGTTYGYTF	#N/A	#N/A	#N/A	#N/A	#N/A	#N/A	#N/A	#N/A	#N/A	#N/A	1.63129791349184e-29	#N/A	#N/A	#N/A	#N/A	#N/A	#N/A	#N/A	#N/A	#N/A	#N/A	#N/A	#N/A	#N/A	#N/A	#N/A	#N/A	#N/A	#N/A	#N/A	#N/A	#N/A	#N/A	#N/A	#N/A	#N/A	#N/A	#N/A	#N/A	#N/A	#N/A	#N/A	#N/A	#N/A	#N/A	#N/A	#N/A	#N/A	1
CASSLYFSSGNTIYF	#N/A	#N/A	#N/A	#N/A	#N/A	#N/A	#N/A	#N/A	#N/A	#N/A	0.00223227444516158	#N/A	#N/A	#N/A	#N/A	#N/A	#N/A	#N/A	#N/A	#N/A	#N/A	#N/A	#N/A	#N/A	#N/A	#N/A	#N/A	#N/A	#N/A	#N/A	#N/A	#N/A	#N/A	#N/A	#N/A	#N/A	#N/A	#N/A	#N/A	#N/A	#N/A	#N/A	#N/A	#N/A	#N/A	#N/A	#N/A	#N/A	1
CAIRADYYGYTF	#N/A	#N/A	#N/A	#N/A	#N/A	#N/A	#N/A	#N/A	#N/A	#N/A	#N/A	0.00437500325572168	#N/A	#N/A	#N/A	#N/A	#N/A	#N/A	#N/A	#N/A	#N/A	#N/A	0.0114068817401221	#N/A	#N/A	#N/A	#N/A	#N/A	#N/A	#N/A	0.0144462543408255	#N/A	#N/A	#N/A	#N/A	#N/A	#N/A	#N/A	#N/A	#N/A	#N/A	#N/A	#N/A	#N/A	#N/A	#N/A	#N/A	#N/A	3
CASSLGSDGYTF	#N/A	#N/A	#N/A	#N/A	#N/A	#N/A	#N/A	#N/A	#N/A	#N/A	#N/A	#N/A	#N/A	#N/A	#N/A	#N/A	#N/A	0.00155154831946235	#N/A	#N/A	#N/A	#N/A	0.0979220844423495	#N/A	#N/A	#N/A	#N/A	#N/A	#N/A	#N/A	#N/A	#N/A	#N/A	#N/A	#N/A	#N/A	#N/A	#N/A	#N/A	#N/A	#N/A	#N/A	#N/A	#N/A	#N/A	#N/A	#N/A	#N/A	1
CASSSRDNYEQYF	#N/A	#N/A	#N/A	#N/A	#N/A	#N/A	#N/A	#N/A	#N/A	#N/A	#N/A	#N/A	#N/A	#N/A	#N/A	#N/A	#N/A	#N/A	#N/A	#N/A	#N/A	#N/A	0.0210502435264654	0.0118199405776358	#N/A	#N/A	#N/A	#N/A	0.204288046980887	#N/A	#N/A	#N/A	#N/A	#N/A	#N/A	#N/A	#N/A	#N/A	#N/A	#N/A	#N/A	0.0778058635094974	0.0431260533897566	#N/A	#N/A	#N/A	0.0119408827429153	#N/A	4
CASKARANQPQHF	#N/A	#N/A	#N/A	#N/A	#N/A	#N/A	#N/A	#N/A	#N/A	#N/A	#N/A	#N/A	#N/A	#N/A	#N/A	#N/A	#N/A	#N/A	#N/A	#N/A	#N/A	#N/A	#N/A	0.0118199405776358	#N/A	#N/A	#N/A	#N/A	#N/A	0.0575005320131651	#N/A	#N/A	#N/A	#N/A	#N/A	#N/A	#N/A	#N/A	#N/A	#N/A	#N/A	#N/A	0.221317355946626	#N/A	#N/A	#N/A	#N/A	#N/A	1
CASTLGAGTEAFF	#N/A	#N/A	#N/A	#N/A	#N/A	#N/A	0.298778916105368	#N/A	#N/A	#N/A	#N/A	0.547986383634266	#N/A	#N/A	#N/A	#N/A	#N/A	#N/A	#N/A	#N/A	0.37421680462369	#N/A	#N/A	0.0310355339225629	#N/A	#N/A	#N/A	#N/A	#N/A	#N/A	#N/A	#N/A	0.481198729284821	#N/A	#N/A	#N/A	#N/A	0.514460034822052	#N/A	#N/A	0.074564741511858	0.113491925109143	0.221317355946626	#N/A	#N/A	0.270954402671874	0.22370273456226	#N/A	1
CASSLQGGMGNQPQHF	#N/A	#N/A	#N/A	#N/A	#N/A	#N/A	#N/A	#N/A	#N/A	#N/A	#N/A	#N/A	#N/A	#N/A	#N/A	#N/A	#N/A	#N/A	#N/A	#N/A	#N/A	#N/A	#N/A	#N/A	#N/A	#N/A	#N/A	#N/A	#N/A	#N/A	#N/A	#N/A	#N/A	2.2330389336991e-09	#N/A	#N/A	#N/A	#N/A	#N/A	#N/A	#N/A	#N/A	#N/A	#N/A	#N/A	#N/A	#N/A	#N/A	1
CASSLTGGYTGELFF	#N/A	#N/A	#N/A	#N/A	#N/A	#N/A	#N/A	#N/A	#N/A	#N/A	#N/A	#N/A	#N/A	#N/A	#N/A	#N/A	#N/A	#N/A	#N/A	#N/A	#N/A	#N/A	#N/A	#N/A	#N/A	#N/A	#N/A	#N/A	#N/A	#N/A	#N/A	#N/A	#N/A	#N/A	#N/A	#N/A	#N/A	#N/A	#N/A	#N/A	#N/A	#N/A	#N/A	#N/A	#N/A	#N/A	#N/A	5.62922720910426e-22	1
CASNKLGYQPQHF	#N/A	#N/A	#N/A	#N/A	#N/A	#N/A	#N/A	#N/A	#N/A	#N/A	#N/A	#N/A	#N/A	#N/A	#N/A	#N/A	#N/A	#N/A	#N/A	#N/A	#N/A	#N/A	#N/A	#N/A	#N/A	#N/A	#N/A	#N/A	#N/A	#N/A	#N/A	#N/A	#N/A	#N/A	#N/A	#N/A	#N/A	#N/A	#N/A	#N/A	#N/A	#N/A	#N/A	#N/A	#N/A	#N/A	#N/A	0.00127425359109074	1
CASSLLENQPQHF	#N/A	#N/A	#N/A	#N/A	#N/A	#N/A	#N/A	#N/A	#N/A	#N/A	#N/A	#N/A	#N/A	#N/A	#N/A	#N/A	#N/A	#N/A	#N/A	#N/A	#N/A	#N/A	#N/A	#N/A	#N/A	#N/A	#N/A	#N/A	#N/A	#N/A	#N/A	#N/A	#N/A	#N/A	#N/A	#N/A	#N/A	#N/A	#N/A	#N/A	#N/A	#N/A	#N/A	#N/A	#N/A	#N/A	#N/A	0.00127425359109074	1
CASNTEVDQPQHF	#N/A	#N/A	#N/A	#N/A	#N/A	#N/A	#N/A	#N/A	#N/A	#N/A	#N/A	#N/A	#N/A	#N/A	#N/A	#N/A	#N/A	#N/A	#N/A	#N/A	#N/A	#N/A	#N/A	#N/A	#N/A	#N/A	#N/A	#N/A	#N/A	#N/A	#N/A	#N/A	#N/A	#N/A	#N/A	#N/A	#N/A	#N/A	#N/A	#N/A	#N/A	#N/A	#N/A	#N/A	#N/A	#N/A	#N/A	0.018926416736835	1
[truncated: 172 more columns]

## Sheet: parameters
param	value
Reference_samp	JH124_NoPep
Baseline_sample	JH124_D-3_PBMC
nTemplates	10
FDR_threshold	0.05
OR_threshold	5
Ignore_baseline_threshold	FALSE
confidence	0.99
nCells	75000
