# Supplementary material for: The Mutation-Associated Neoantigen Functional Expansion of Specific T Cells (MANAFEST) Assay: A Sensitive Platform for Monitoring Antitumor Immunity
Source: Oxford University Press journal article supplement (doi:10.1158/2326-6066.cir-18-0129), 2018-06-12
Supplement: 23266066cir180129-sup-197967_2_supp_4765732_p8w2bb.docx [file 23266066cir180129-sup-197967_2_supp_4765732_p8w2bb.docx]

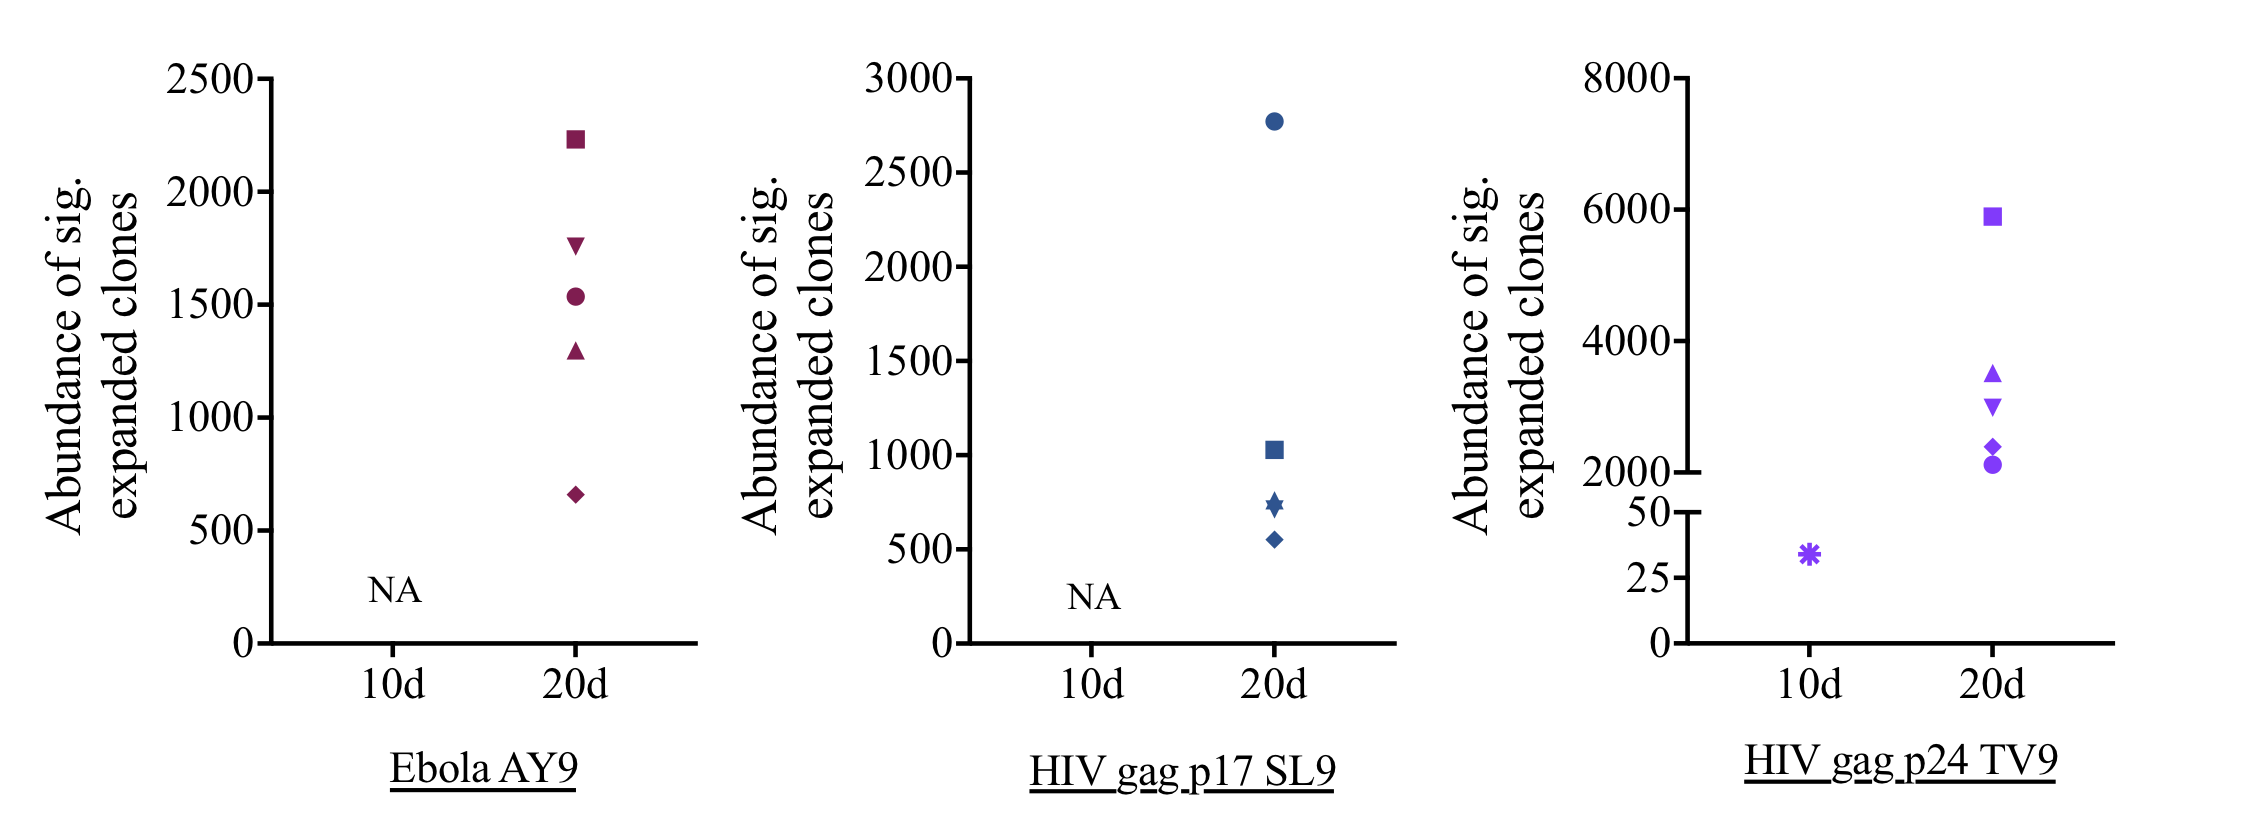


**Supplementary Figure 1. Expanded clonotypes detected to negative control ebola and HIV-1 peptide epitopes after 10-day and 20-day cultures**. T cells from a healthy donor were cultured for 10 days in the presence of the HLA A*11:01-restricted ebolavirus AY9AAGIAWIPY (left), the HLA A*02:01-restricted HIV-1 SL9SLYNTVATL (middle), and the HLA A*02:01-restricted HIV-1 TV9TLNAWVKVV (right) epitopes, followed by TCR sequencing of the expanded T cells. In tandem cultures, cells were restimulated with irradiated peptide-loaded, autologous T cell-depleted PBMC and were cultured for an additional 10 days followed by TCR sequencing of the expanded T cells. Within each graph, each symbol represents a unique expanded T cell clonotype as determined by significant expansion (p<0.05) relative to T cells cultured without peptide. Data are shown as the number of templates detected after expansion in the relevant culture (abundance). The full dataset, including clonotype identity, FDR, and abundance and frequency after culture are shown in Supplementary Table 5.
